# Supplementary material for: Low-Dose Piperlongumine Rescues Impaired Function of Endothelial Progenitor Cells and Reduces Cerebral Ischemic Injury in High-Fat Diet-Fed Mice
Source: PubMed Central journal article supplement (PMC8634707; doi:10.3389/fphar.2021.689880), 2021-11-15
Supplement: DataSheet1.pdf [file DataSheet1.pdf]

**Supplementary Table 1. Summary of statistical data**

| Figure | Test        | Number of animals | Values                                                                                                                                                      | Statistical Test                                  |
|--------|-------------|-------------------|-------------------------------------------------------------------------------------------------------------------------------------------------------------|---------------------------------------------------|
| 1      | Food intake | Con=8             | Week 1: 22.4375;<br>Week 2: 23.2375;<br>Week 3: 21.42;<br>Week 4: 20.65;<br>Week 5: 21.34286;<br>Week 6: 21.94286;<br>Week 7: 20.38571;<br>Week 8: 20.87143 | one-way ANOVA followed by Tukey post hoc analysis |
|        |             | HF=11             | Week 1: 23.94545;<br>Week 2: 24.02727;<br>Week 3: 25.61454;<br>Week 4: 22.68182;<br>Week 5: 25.7;<br>Week 6: 23.4125;<br>Week 7: 25.9;<br>Week 8: 22.81111  |                                                   |
|        |             | PIP=10            | Week 1: 23.76;<br>Week 2: 24.5;<br>Week 3: 23.936;<br>Week 4: 25.08889;<br>Week 5: 24.33333;<br>Week 6: 25.21111;<br>Week 7: 23.94444;<br>Week 8: 21.64444  |                                                   |
|        |             |                   |                                                                                                                                                             |                                                   |

|               |          |                                                                                                                                                                                                            |                                                   |
|---------------|----------|------------------------------------------------------------------------------------------------------------------------------------------------------------------------------------------------------------|---------------------------------------------------|
| Body weight   | Con=7-8  | Week 0: 20.95±0.33;<br>Week 1: 22.63±0.40;<br>Week 2: 23.69±0.46;<br>Week 3: 24.70±0.65;<br>Week 4: 25.01±1.18;<br>Week 5: 25.76±0.62;<br>Week 6: 26.27±0.95;<br>Week 7: 26.86±1.30;<br>Week 8: 27.09±1.17 | one-way ANOVA followed by Tukey post hoc analysis |
|               | HF=9-11  | Week 0: 22.16±0.28;<br>Week 1: 22.28±0.28;<br>Week 2: 25.75±0.33;<br>Week 3: 26.25±0.42;<br>Week 4: 26.15±0.45;<br>Week 5: 26.79±0.50;<br>Week 6: 27.73±0.54;<br>Week 7: 28.34±0.48;<br>Week 8: 28.37±0.41 |                                                   |
|               | PIP=9-11 | Week 0: 21.88±0.32;<br>Week 1: 23.95±0.31;<br>Week 2: 24.76±0.47;<br>Week 3: 25.56±0.70;<br>Week 4: 26.21±0.54;<br>Week 5: 27.21±0.61;<br>Week 6: 28.26±0.62;<br>Week 7: 28.70±0.67;<br>Week 8: 28.28±0.57 |                                                   |
| Blood glucose | Con=7    | Con=1.00±0.10                                                                                                                                                                                              | one-way ANOVA followed by Tukey post hoc analysis |
|               | HF=9     | HF=1.14±0.03                                                                                                                                                                                               |                                                   |
|               | PIP=9    | PIP=1.30±0.07                                                                                                                                                                                              |                                                   |
| TC in blood   | Con=5    | Con=1.00±0.02                                                                                                                                                                                              | one-way ANOVA followed by Tukey post hoc analysis |
|               | HF=9     | HF=1.30±0.04                                                                                                                                                                                               |                                                   |
|               | PIP=8    | PIP=1.24±0.07                                                                                                                                                                                              |                                                   |

|   |                               |        |               |                                                      |
|---|-------------------------------|--------|---------------|------------------------------------------------------|
|   | TG in blood                   | Con=5  | Con=1.00±0.06 | one-way ANOVA followed by<br>Tukey post hoc analysis |
|   |                               | HF=9   | HF=1.42±0.14  |                                                      |
|   |                               | PIP=9  | PIP=1.40±0.07 |                                                      |
|   | LDL-c in blood                | Con=5  | Con=1.00±0.02 | one-way ANOVA followed by<br>Tukey post hoc analysis |
|   |                               | HF=9   | HF=1.47±0.13  |                                                      |
|   |                               | PIP=9  | PIP=1.33±0.06 |                                                      |
|   | HDL-c in blood                | Con=5  | Con=1.00±0.02 | one-way ANOVA followed by<br>Tukey post hoc analysis |
|   |                               | HF=9   | HF=1.26±0.04  |                                                      |
|   |                               | PIP=9  | PIP=1.21±0.06 |                                                      |
| 2 | Migrated Cells                | Con=15 | Con=1.00±0.07 | one-way ANOVA followed by<br>Tukey post hoc analysis |
|   |                               | HF=15  | HF=0.42±0.02  |                                                      |
|   |                               | PIP=16 | PIP=0.94±0.05 |                                                      |
|   | Tube number                   | Con=20 | Con=1.00±0.04 | one-way ANOVA followed by<br>Tukey post hoc analysis |
|   |                               | HF=20  | HF=0.60±0.03  |                                                      |
|   |                               | PIP=20 | PIP=1.37±0.06 |                                                      |
|   | Adherent Cells                | Con=25 | Con=1.00±0.03 | one-way ANOVA followed by<br>Tukey post hoc analysis |
|   |                               | HF=20  | HF=0.57±0.04  |                                                      |
|   |                               | PIP=26 | PIP=0.81±0.09 |                                                      |
|   | DHE<br>fluorescence           | Con=4  | Con=1.00±0.01 | one-way ANOVA followed by<br>Tukey post hoc analysis |
|   |                               | HF=4   | HF=1.24±0.02  |                                                      |
|   |                               | PIP=5  | PIP=0.83±0.02 |                                                      |
|   | DAF-FM<br>fluorescence        | Con=5  | Con=1.00±0.05 | one-way ANOVA followed by<br>Tukey post hoc analysis |
|   |                               | HF=4   | HF=0.41±0.07  |                                                      |
|   |                               | PIP=4  | PIP=1.08±0.18 |                                                      |
| 3 | Infarct Volume                | Con=8  | Con=1.00±0.04 | one-way ANOVA followed by<br>Tukey post hoc analysis |
|   |                               | HF=8   | HF=2.44±0.10  |                                                      |
|   |                               | PIP=8  | PIP=1.91±0.12 |                                                      |
|   | Asymmetric<br>body swing rate | Con=8  | Con=1.00±0.07 | one-way ANOVA followed by<br>Tukey post hoc analysis |
|   |                               | HF=8   | HF=1.75±0.03  |                                                      |
|   |                               | PIP=8  | PIP=1.33±0.17 |                                                      |
|   | Time to cross<br>beam         | Con=8  | Con=1.00±0.05 | one-way ANOVA followed by<br>Tukey post hoc analysis |
|   |                               | HF=8   | HF=1.30±0.06  |                                                      |
|   |                               | PIP=8  | PIP=0.99±0.04 |                                                      |
| 4 | Migrated Cells                | HF=15  | HF=1.00±0.07  | one-way ANOVA followed by                            |

|          |                               |                  |                  |                                                      |  |
|----------|-------------------------------|------------------|------------------|------------------------------------------------------|--|
|          |                               | HF+0.1=15        | HF+0.1=1.33±0.08 | Tukey post hoc analysis                              |  |
|          |                               | HF+1.0=15        | HF+1.0=1.76±0.13 |                                                      |  |
|          |                               |                  |                  |                                                      |  |
|          | Migrated Cells                | Con=13           | Con=1.00±0.07    | one-way ANOVA followed by<br>Tukey post hoc analysis |  |
|          |                               | HF=13            | HF=0.62±0.04     |                                                      |  |
|          |                               | HF+PIP=13        | HF+PIP=0.94±0.05 |                                                      |  |
|          |                               |                  |                  |                                                      |  |
|          | Tube number                   | Con=15           | Con=1.00±0.03    | one-way ANOVA followed by<br>Tukey post hoc analysis |  |
|          |                               | HF=20            | HF=0.60±0.03     |                                                      |  |
|          |                               | HF+PIP=15        | HF+PIP=0.94±0.04 |                                                      |  |
|          |                               |                  |                  |                                                      |  |
|          | Adherent Cells                | Con=17           | Con=1.00±0.05    | one-way ANOVA followed by<br>Tukey post hoc analysis |  |
|          |                               | HF=20            | HF=0.57±0.04     |                                                      |  |
|          |                               | HF+PIP=17        | HF+PIP=0.80±0.04 |                                                      |  |
|          |                               |                  |                  |                                                      |  |
|          | TSP-1 level                   | Con=7            | Con=1.00±0.06    | one-way ANOVA followed by<br>Tukey post hoc analysis |  |
|          |                               | HF=7             | HF=2.74±0.40     |                                                      |  |
|          |                               | HF+PIP=7         | HF+PIP=1.46±0.26 |                                                      |  |
|          |                               |                  |                  |                                                      |  |
|          | TSP-2 level                   | Con=6            | Con=1.00±0.04    | one-way ANOVA followed by<br>Tukey post hoc analysis |  |
|          |                               | HF=6             | HF=2.11±0.15     |                                                      |  |
|          |                               | HF+PIP=6         | HF+PIP=1.51±0.03 |                                                      |  |
|          |                               |                  |                  |                                                      |  |
| 5        | Infarct Volume                | HF=9             | HF=1.00±0.02     | one-way ANOVA followed by<br>Tukey post hoc analysis |  |
|          |                               | HF+HF=9          | HF+HF=0.84±0.04  |                                                      |  |
|          |                               | HF+PIP=8         | HF+PIP=0.66±0.03 |                                                      |  |
|          |                               |                  |                  |                                                      |  |
|          | Asymmetric<br>body swing rate | HF=9             | HF=1.00±0.02     | one-way ANOVA followed by<br>Tukey post hoc analysis |  |
|          |                               | HF+HF=9          | HF+HF=0.73±0.06  |                                                      |  |
|          |                               | HF+PIP=8         | HF+PIP=0.60±0.04 |                                                      |  |
|          |                               |                  |                  |                                                      |  |
|          | Time to cross<br>beam         | HF=9             | HF=1.00±0.05     | one-way ANOVA followed by<br>Tukey post hoc analysis |  |
| HF+HF=9  |                               | HF+HF=0.81±0.01  |                  |                                                      |  |
| HF+PIP=8 |                               | HF+PIP=0.66±0.01 |                  |                                                      |  |
|          |                               |                  |                  |                                                      |  |
| 6        | Capillaries<br>(CD31)         | HF=9             | HF=1.00±0.05     | one-way ANOVA followed by<br>Tukey post hoc analysis |  |
|          |                               | HF+HF=12         | HF+HF=1.34±0.08  |                                                      |  |
|          |                               | HF+PIP=12        | HF+PIP=2.23±0.09 |                                                      |  |
|          |                               |                  |                  |                                                      |  |
|          | Capillaries<br>(vWF)          | HF=9             | HF=1.00±0.10     | one-way ANOVA followed by<br>Tukey post hoc analysis |  |
|          |                               | HF+HF=8          | HF+HF=1.89±0.14  |                                                      |  |
| HF+PIP=8 |                               | HF+PIP=2.81±0.22 |                  |                                                      |  |
